# Supplementary material for: The NICE search filters for treating and managing COVID-19: validation in MEDLINE and Embase (Ovid)
Source: PubMed Central journal article supplement (PMC11412126; doi:10.5195/jmla.2024.1806), 2024-07-01
Supplement: jmla-112-3-225-s01.pdf [file jmla-112-3-225-s01.pdf]

## Appendix A Version history for the NICE search filters for treating and managing COVID-19

The full search strategies for each Ovid MEDLINE version are available in the online-only supporting materials, see File A posted to OSF.

| Version | Date implemented | Actions                                                                                                                                                                                                                                                                                                                                                                                                                                                                                                                            |
|---------|------------------|------------------------------------------------------------------------------------------------------------------------------------------------------------------------------------------------------------------------------------------------------------------------------------------------------------------------------------------------------------------------------------------------------------------------------------------------------------------------------------------------------------------------------------|
| v1      | March 16, 2020   | Terms suggested by Public Health England (now the UK Health Security Agency) added to MEDLINE and Embase in Ovid.                                                                                                                                                                                                                                                                                                                                                                                                                  |
| v2      | March 17, 2020   | <p>Quality Assurance of v1:</p> <ul style="list-style-type: none"> <li>• Added the free-text term "epidemic".</li> <li>• Added the free-text term "OR Huanan" alongside the term "Wuhan".</li> <li>• Replaced AND with adj10 to increase specificity on the free-text line for "outbreak".</li> <li>• Added a free-text line for the phrase "severe acute respiratory syndrome*".</li> <li>• Added the Keyword Heading field to capture authors' keywords as this was a new area where the indexing was not up to date.</li> </ul> |
| v3      | March 18, 2020   | <p>Increased the precision as it was retrieving too many records on other epidemics in China (e.g. malaria).</p> <p>Split the lines on ("respiratory symptom*" or "seafood market") from ("outbreak* or wildlife* or pandemic") so that the adjacency could be narrowed.</p>                                                                                                                                                                                                                                                       |
| v4      | March 19, 2020   | <p>This version was added to the Interim process manual published on the NICE website.</p> <ul style="list-style-type: none"> <li>• Identified and added the Emtree heading "Coronavirinae".</li> <li>• Added "Coronavirinae" to the free text.</li> </ul>                                                                                                                                                                                                                                                                         |

|    |                |                                                                                                                                                                                                                                                                                                                                                                                                                                                                                                                                                                                                                                                                                                                                                                |
|----|----------------|----------------------------------------------------------------------------------------------------------------------------------------------------------------------------------------------------------------------------------------------------------------------------------------------------------------------------------------------------------------------------------------------------------------------------------------------------------------------------------------------------------------------------------------------------------------------------------------------------------------------------------------------------------------------------------------------------------------------------------------------------------------|
|    |                | <ul style="list-style-type: none"> <li>• Added "respiratory condition" to the free text and remodeled this line.</li> <li>• Made changes to the way that "Wuhan" and "Huanan" were included as free-text terms.</li> </ul>                                                                                                                                                                                                                                                                                                                                                                                                                                                                                                                                     |
| v5 | March 21, 2020 | <p>Identified an additional MeSH heading:</p> <ul style="list-style-type: none"> <li>• Added Coronavirus Infections/</li> </ul>                                                                                                                                                                                                                                                                                                                                                                                                                                                                                                                                                                                                                                |
| v6 | March 25, 2020 | <p>Made the strategies more specific following feedback they were still over retrieving records about other epidemics in China:</p> <ul style="list-style-type: none"> <li>• Changed the position of "Wuhan" in the strategy but also added "pneumonia" to the line on respiratory conditions.</li> <li>• Added the abbreviation "HCoV" for human coronaviruses to the free text; this had a small impact as the relevant subject headings were already incorporated by exploding the ones higher in the hierarchy.</li> <li>• Undertook extensive testing in MEDLINE on the Keyword Heading and Keyword Heading Word fields (the fields were different in Embase).</li> <li>• Changed all MEDLINE free-text lines to use the fields (.ti,ab,kw,kf)</li> </ul> |
| v7 | April 8, 2020  | <p>No substantive changes but some free-text lines were separated to make the strategy easier to read.</p>                                                                                                                                                                                                                                                                                                                                                                                                                                                                                                                                                                                                                                                     |
| v8 | April 16, 2020 | <p>Added terms to the free text for consistency:</p> <ul style="list-style-type: none"> <li>• nCoV19 or "nCoV-19"</li> <li>• HCoV19 or "HCoV-19"</li> </ul>                                                                                                                                                                                                                                                                                                                                                                                                                                                                                                                                                                                                    |
| v9 | June 3, 2020   | <p>Undertook an in-depth review of the free-text lines and the structure:</p>                                                                                                                                                                                                                                                                                                                                                                                                                                                                                                                                                                                                                                                                                  |

|     |                |                                                                                                                                                                                                                                                                                                                                                                                                                                                                                                                                                                                                                                                                                                                                                                                                                                                                                                                                                             |
|-----|----------------|-------------------------------------------------------------------------------------------------------------------------------------------------------------------------------------------------------------------------------------------------------------------------------------------------------------------------------------------------------------------------------------------------------------------------------------------------------------------------------------------------------------------------------------------------------------------------------------------------------------------------------------------------------------------------------------------------------------------------------------------------------------------------------------------------------------------------------------------------------------------------------------------------------------------------------------------------------------|
|     |                | <ul style="list-style-type: none"> <li>• Reviewed the free-text terms used for "COVID-19" and "SARS-CoV-2", including how they were truncated.</li> <li>• Removed some of the free-text terms that had zero hits.</li> <li>• Checked all lines for consistency, adding some truncation.</li> <li>• Tested and decided not to add some additional terms that had been identified, such as "Betacoronavirus".</li> <li>• Changed the structure slightly to remove references on pneumonia in China not relevant to this pandemic.</li> </ul>                                                                                                                                                                                                                                                                                                                                                                                                                  |
| v10 | April 16, 2021 | <p>Undertook extensive testing of each free-text line.</p> <p>Added the new MeSH and Emtree headings that were now available in Ovid.</p> <p>Did a comparison to the COVID-19 Limit that Ovid built into MEDLINE.</p> <p>Completely restructured the strategies to make them more concise.</p> <p>The strategies, as published in the June 2021 preprint:</p> <ul style="list-style-type: none"> <li>• were developed for the NICE remit on COVID-19.</li> <li>• did not include the MeSH headings "exp <a href="#">COVID-19 Testing</a>" or "COVID-19 Vaccines".</li> <li>• included subject headings for "COVID-19" and "SARS-CoV-2" rather than exploding the terms from higher in the hierarchy, as in previous versions.</li> <li>• did not aim to cover comprehensively other coronaviruses (such as MERS or SARS).</li> <li>• included a publication date limit of 2019-current to restrict the number of records on other coronaviruses.</li> </ul> |

|     |                   |                                                                                                                                                                                                                                                                                                                                                                                                                                                                                                                                                                                                                                                                                                                                                                                                                                                                                                                                                                                                                                                                                                                                                                                                                     |
|-----|-------------------|---------------------------------------------------------------------------------------------------------------------------------------------------------------------------------------------------------------------------------------------------------------------------------------------------------------------------------------------------------------------------------------------------------------------------------------------------------------------------------------------------------------------------------------------------------------------------------------------------------------------------------------------------------------------------------------------------------------------------------------------------------------------------------------------------------------------------------------------------------------------------------------------------------------------------------------------------------------------------------------------------------------------------------------------------------------------------------------------------------------------------------------------------------------------------------------------------------------------|
|     |                   | <ul style="list-style-type: none"> <li>• was not tested for retrieval of records about variations of SARS-CoV-2 (no missing records identified).</li> <li>• used COVID*2 to retrieve "COVID-19" and "COVID19" while avoiding retrieving terms such as "Covidence", meaning a small number of records about COVID-19 that use unusual terminology (e.g. "covidology") were not retrieved, although they were all verified as being out of the NICE remit.</li> <li>• removed some of the free-text lines relating to "Wuhan" and "food markets", which were not relevant to managing or treating COVID-19 but were required to identify papers written in January 2020 about the early identification of the pandemic.</li> <li>• did not include terms for related conditions that are not exclusively caused by COVID-19 e.g. Macrophage Activation Syndrome, Cytokine Release Syndrome and Multisystem Inflammatory Syndrome.</li> <li>• incorporated a Boolean NOT to exclude some phrases (e.g. coefficients of variation) that are abbreviated to CoV but are not relevant to COVID-19.</li> <li>• did not aim to cover general pandemic preparedness.</li> <li>• was not optimized for long covid.</li> </ul> |
| v11 | November 16, 2021 | <p>Further testing and revisions were made:</p> <ul style="list-style-type: none"> <li>• Testing showed that the date limit could be changed from 2019 to 2020 to make the strategy more precise.</li> <li>• Free-text terms for "anticovid" tested and rejected.</li> <li>• Free-text terms for the Delta variant tested and rejected as they did not improve recall of records relevant to NICE.</li> <li>• The appropriate updates were completed as Ovid updated Embase in September 2021 so that it has the</li> </ul>                                                                                                                                                                                                                                                                                                                                                                                                                                                                                                                                                                                                                                                                                         |

|                      |                |                                                                                                                                                                                                                                                                                                                                                                                                                                                                                                                                                                                                                                                                   |
|----------------------|----------------|-------------------------------------------------------------------------------------------------------------------------------------------------------------------------------------------------------------------------------------------------------------------------------------------------------------------------------------------------------------------------------------------------------------------------------------------------------------------------------------------------------------------------------------------------------------------------------------------------------------------------------------------------------------------|
|                      |                | same Keyword Heading and Keyword Heading Word fields as MEDLINE.                                                                                                                                                                                                                                                                                                                                                                                                                                                                                                                                                                                                  |
| v12                  | April 24, 2023 | <p>Further testing and revisions were made before validation with the gold-standard set.</p> <ul style="list-style-type: none"> <li>• Omicron.ti,kf was added to improve recall.</li> <li>• More extensive terms for Variants of Interest or Concern were tested and rejected as they did not improve recall.</li> <li>• The MeSH headings COVID-19 Drug Treatment/ and COVID-19 Serotherapy/ were tested and added to the MEDLINE search strategy.</li> <li>• Tested and decided not to explode the Emtree heading "Coronavirus Disease 2019" to avoid adversely affecting precision with recall of records about secondary conditions, such as VITT.</li> </ul> |
| Draft search filters | April 24, 2023 | Adopted version 12 as the draft search filters for testing and validation in this paper.                                                                                                                                                                                                                                                                                                                                                                                                                                                                                                                                                                          |
