# Supplementary material for: The NICE search filters for treating and managing COVID-19: validation in MEDLINE and Embase (Ovid)
Source: PubMed Central journal article supplement (PMC11412126; doi:10.5195/jmla.2024.1806), 2024-07-01
Supplement: jmla-112-3-225-s02.pdf [file jmla-112-3-225-s02.pdf]

## Appendix B List of free-text terms considered during development of the filters

Terms with the status Removed were in earlier versions (v1 to v11) before validation of the filters. Terms with the status Rejected have never been required to maintain recall performance. Further details are available in the online-only supporting materials, see File D posted to OSF.

| Free-text terms considered | Status in the search filters |
|----------------------------|------------------------------|
| "2019-nCoV"                | Removed                      |
| "2019-nCoV*"               | Removed                      |
| "CORVID-19"                | Removed                      |
| "CoV 19*"                  | Rejected                     |
| "CoV 2*"                   | Rejected                     |
| "COVID-19"                 | Removed                      |
| "HCoV-19"                  | Removed                      |
| "HCoV-2019"                | Removed                      |
| "nCoV-19"                  | Removed                      |
| "nCoV-19*"                 | Removed                      |
| "nCoV-2019"                | Removed                      |
| "nCoV-2019*"               | Removed                      |
| "SARS coronavirus2"        | Removed                      |
| "SARS coronavirus2"        | Removed                      |
| "SARS-2"                   | Removed                      |
| "SARScoronavirus 2"        | Removed                      |
| "SARS-coronavirus-2"       | Removed                      |
| "SARScoronavirus 2"        | Removed                      |
| "SARS-coronavirus-2"       | Removed                      |

|                                                                                                                                                                                            |          |
|--------------------------------------------------------------------------------------------------------------------------------------------------------------------------------------------|----------|
| "SARSCov-19"                                                                                                                                                                               | Removed  |
| "SARS-Cov19"                                                                                                                                                                               | Removed  |
| "SARS-Cov-19"                                                                                                                                                                              | Removed  |
| "SARSCoV-2"                                                                                                                                                                                | Removed  |
| "SARS-CoV2"                                                                                                                                                                                | Removed  |
| "SARS-CoV-2"                                                                                                                                                                               | Removed  |
| "SARSCovID-19*"                                                                                                                                                                            | Rejected |
| "SARS-CovID19*"                                                                                                                                                                            | Rejected |
| "SARS-CovID-19*"                                                                                                                                                                           | Rejected |
| "SARSCoVID2*"                                                                                                                                                                              | Rejected |
| "SARS-CoVID2*"                                                                                                                                                                             | Rejected |
| "SARSCovID-2019*"                                                                                                                                                                          | Rejected |
| "SARS-CovID2019*"                                                                                                                                                                          | Rejected |
| "SARS-CovID-2019*"                                                                                                                                                                         | Rejected |
| "WN-CoV"                                                                                                                                                                                   | Removed  |
| "wuhan virus*"                                                                                                                                                                             | Rejected |
| ((("respiratory illness*" or "respiratory disease*" or "respiratory symptom*" or "seafood market*" or "food market*") adj10 (Wuhan* or Hubei* or China* or Chinese* or Huanan*)))          | Removed  |
| ((("seafood market*" or "food market*" or pneumonia*) adj10 (Wuhan* or Hubei* or China* or Chinese* or Huanan*)))                                                                          | Removed  |
| ((("respiratory*" adj2 (symptom* or disease* or illness* or condition*)) or "seafood market*" or "food market*" or pneumonia*) adj10 (Wuhan* or Hubei* or China* or Chinese* or Huanan*))) | Removed  |
| ((("respiratory*" adj2 (symptom* or disease* or illness* or condition*)) or "seafood market*" or "food market*") adj10 (Wuhan* or Hubei* or China* or Chinese* or Huanan*)))               | Removed  |

|                                                                                                                                                                                                                                                                                                                                                                                                                                                                                                                                                          |          |
|----------------------------------------------------------------------------------------------------------------------------------------------------------------------------------------------------------------------------------------------------------------------------------------------------------------------------------------------------------------------------------------------------------------------------------------------------------------------------------------------------------------------------------------------------------|----------|
| ((alpha* or beta* or gamma* or delta* or lambda* or mu or "B.1.1.7" or "B 1 1 7" or B117 or "B.1.351" or "B 1 351" or B1351 or "P.1" or "P 1" or P1 or "B.1.617.2" or "B 1 617 2" or B16172 or "C.37" or "C 37" or C37 or "B.1.621" or "B 1 621" or B1621) adj (variant* or variation* or VOC or VOCs or VOI or VOIs or VOI or lineage* or strain*)).ti,ab,kw,kf.                                                                                                                                                                                        | Rejected |
| ((corona* or corono*) adj1 (virus* or viral* or virinae*))                                                                                                                                                                                                                                                                                                                                                                                                                                                                                               | Removed  |
| ((corona* or corono*) adj1 (virus* or viral*))                                                                                                                                                                                                                                                                                                                                                                                                                                                                                                           | Removed  |
| ((outbreak* or "respiratory illness*" or "respiratory disease*" or "respiratory symptom*" or "seafood market*" or "food market*" or wildlife* or pandemic* or epidemic*) adj10 (Wuhan* or Hubei* or China* or Chinese* or Huanan*))                                                                                                                                                                                                                                                                                                                      | Removed  |
| ((outbreak* or "respiratory illness*" or "respiratory disease*" or "respiratory symptom*" or "seafood market*" or "food market*" or wildlife*) adj10 (Wuhan* or Hubei* or China* or Chinese* or Huanan*))                                                                                                                                                                                                                                                                                                                                                | Removed  |
| ((outbreak* or wildlife* or pandemic* or epidemic*) adj1 (China* or Chinese* or Huanan*))                                                                                                                                                                                                                                                                                                                                                                                                                                                                | Removed  |
| ((outbreak* or wildlife* or pandemic* or epidemic*) adj1 (Wuhan* or Hubei* or China* or Chinese* or Huanan*))                                                                                                                                                                                                                                                                                                                                                                                                                                            | Removed  |
| ((outbreak* or wildlife* or pandemic* or epidemic*) adj1 (Wuhan* or Hubei* or China* or Chinese* or Huanan*))                                                                                                                                                                                                                                                                                                                                                                                                                                            | Removed  |
| (Omicron* or "B.1.1.529" or "B1.1.529" or B11529 or "BA.5" or BA5 or "BF.7" or BF7 or "BF.14" or BF14 or "BQ.1" or BQ1 or "BQ.1.1" or "BQ1.1" or BQ11 or "BA.2.75" or "BA2.75" or BA275 or "BA.2" or BA2 or "BA.4.6" or "BA4.6" or "BA46" or "BA.4" or BA4 or XBB or "XBB.1.5" or "XBB1.5" or XBB15 or "BA.2.3.20" or "BA2.3.20" or BA2320 or "BA.2" or BA2 or "BA.4/5" or "BA4/5" or "BA.4.5" or "BA4.5" or BA45 or XBC or "BN.1" or BN1 or "CH.1.1" or CH11 or "CH1.1" or "CH.1.1.1" or "CH1.1.1" or CH111 or "CH.1.1.2" or "CH1.1.2" or CH112 or XBF) | Rejected |
| (pneumonia* adj3 (Wuhan* or Hubei* or China* or Chinese* or Huanan*))                                                                                                                                                                                                                                                                                                                                                                                                                                                                                    | Removed  |

|                                                                                                                                |          |
|--------------------------------------------------------------------------------------------------------------------------------|----------|
| (respiratory* adj2 (symptom* or disease* or illness* or condition*) adj10 (Wuhan* or Hubei* or China* or Chinese* or Huanan*)) | Removed  |
| (respiratory* adj2 (symptom* or disease* or illness* or condition*) adj5 (Wuhan* or Hubei* or China* or Chinese* or Huanan*))  | Removed  |
| 2019nCoV                                                                                                                       | Removed  |
| anticorona*                                                                                                                    | Rejected |
| anticov*                                                                                                                       | Rejected |
| antincov*                                                                                                                      | Rejected |
| anti-sars*                                                                                                                     | Rejected |
| Betacoronavirus*                                                                                                               | Rejected |
| Betacoronavirus*                                                                                                               | Rejected |
| coronavirinae*                                                                                                                 | Removed  |
| coronavirus*                                                                                                                   | Removed  |
| CORVID19                                                                                                                       | Removed  |
| CoV                                                                                                                            | Removed  |
| COV19*                                                                                                                         | Rejected |
| CoV2*                                                                                                                          | Rejected |
| COVID19                                                                                                                        | Removed  |
| HCoV19                                                                                                                         | Removed  |
| HCoV2019                                                                                                                       | Removed  |
| Huanan                                                                                                                         | Removed  |
| Hubei*                                                                                                                         | Removed  |
| Ncorona*                                                                                                                       | Removed  |
| Ncorono*                                                                                                                       | Removed  |

|                     |          |
|---------------------|----------|
| Ncov                | Removed  |
| nCoV19              | Removed  |
| nCoV19*             | Removed  |
| nCoV2019            | Removed  |
| nCoV2019*           | Removed  |
| NcovChina*          | Removed  |
| NcovChinese*        | Removed  |
| NcovHubei*          | Removed  |
| Ncovor              | Removed  |
| NcovWuhan*          | Removed  |
| Omicron*            | Rejected |
| SARS 2 coronavirus* | Rejected |
| SARS2               | Removed  |
| SARS-2-Cov          | Rejected |
| SARS-2-nCoV         | Rejected |
| SARScoronavirus2    | Removed  |
| SARScoronovirus2    | Removed  |
| SARSCov19           | Removed  |
| SARSCoV2            | Removed  |
| SARSCovID19*        | Rejected |
| SARSCovID2019*      | Rejected |
| WNCov               | Removed  |

|        |         |
|--------|---------|
| Wuhan* | Removed |
|--------|---------|
