# Supplementary material for: The NICE search filters for treating and managing COVID-19: validation in MEDLINE and Embase (Ovid)
Source: PubMed Central journal article supplement (PMC11412126; doi:10.5195/jmla.2024.1806), 2024-07-01
Supplement: jmla-112-3-225-s03.pdf [file jmla-112-3-225-s03.pdf]

Appendix C Description of the online-only supporting materials available from Open Science Framework (OSF)

All of the supporting online-only files associated with this article are available in the Open Science Framework at <https://osf.io/hwgke/>.

| File   | Format          | Title                                                        | Contents                                                                                                                                      |
|--------|-----------------|--------------------------------------------------------------|-----------------------------------------------------------------------------------------------------------------------------------------------|
| File A | Microsoft Word  | Version history for Ovid MEDLINE                             | Includes the MEDLINE search strategies for all 12 versions                                                                                    |
| File B | Microsoft Word  | Search strategies for testing and validation in Ovid MEDLINE | Includes the strategies for MEDLINE for Recall Test 1, Recall Test 2, Precision Test and Validation                                           |
| File C | Microsoft Word  | Search strategies for testing and validation in Ovid Embase  | Includes the strategies for Embase for Recall Test 1, Recall Test 2, Precision Test and Validation                                            |
| File D | Microsoft Excel | List of free-text terms considered                           | List of terms considered during development of the filters                                                                                    |
| File E | Microsoft Excel | Recall test 1: set obtained from Butcher et al. (2022)       | Includes the list received from Butcher et al. and the updated data used in this paper                                                        |
| File F | Microsoft Excel | Recall test 2: supplementary test set                        | Includes the list downloaded from Epistemonikos, the relevant systematic reviews and the list of primary studies obtained from citationchaser |
| File G | Microsoft Excel | Precision test: screening decisions for MEDLINE              | Lists showing the screening decisions made for the                                                                                            |

|        |                 |                                                              |                                                                                                                                           |
|--------|-----------------|--------------------------------------------------------------|-------------------------------------------------------------------------------------------------------------------------------------------|
|        |                 |                                                              | records obtained from Ovid MEDLINE                                                                                                        |
| File H | Microsoft Excel | Precision test: screening decisions for Embase               | Lists showing the screening decisions made for the records obtained from Ovid Embase                                                      |
| File I | Microsoft Excel | Precision test: screening decisions for deduplicated records | Lists showing the screening decisions made for the deduplicated test set                                                                  |
| File J | Microsoft Excel | Precision test: frequency counts                             | Frequency counts obtained from <a href="http://www.rapidtables.com">www.rapidtables.com</a> for the items excluded in the precision tests |
| File K | Microsoft Excel | Gold-standard set for Ovid MEDLINE                           | Includes the gold-standard set downloaded from the Cochrane COVID-19 Study Register and cleaned for validation in MEDLINE                 |
| File L | Microsoft Excel | Gold-standard set for Ovid Embase                            | Includes the gold-standard set downloaded from the Cochrane COVID-19 Study Register and cleaned for validation in Embase                  |
| File M | Microsoft Word  | NICE COVID-19 search filters                                 | A downloadable file containing the search filters to encourage their reuse                                                                |
